# Supplementary material for: Comprehensive Genomic Survey, Evolution, and Expression Analysis of GIF Gene Family during the Development and Metal Ion Stress Responses in Soybean
Source: MDPI journal article supplement (doi:10.3390/plants11040570), 2022-02-21
Supplement: s1 [file s1]

**Table S1.** Sequences of GmGIFs gene primers for qPCR used in this study

| Sr.no. | Gene name  | Primer (5' - 3')        |
|--------|------------|-------------------------|
| 1      | GmGIF1-F   | ATCAGGCAGTGGCTCTGTAG    |
|        | GmGIF1-R   | TTCACCACCCTCTGAGCTTC    |
| 2      | GmGIF2-F   | ATTTCCCAGTGTCCTACCC     |
|        | GmGIF2-R   | GCAAGTTTGGCCAGAAAAGT    |
| 3      | GmGIF3-F   | GCTGCTCTTGGAGGTGGA      |
|        | GmGIF3-R   | CGTCTCCACCAGCTGTTCC     |
| 4      | GmGIF4-F   | GGCCTGTTATGACACATTGC    |
|        | GmGIF4-R   | TGTTTGTGAATGCTGCAAATC   |
| 5      | GmGIF5-F   | GCTCCTGTACTCCCAACA      |
|        | GmGIF5-R   | CCAATGCGTACAAAGTCC      |
| 6      | GmGIF6-F   | ACAATGAGGGCGGCAACA      |
|        | GmGIF6-R   | AGCTGCAGAGCTGCCTTG      |
| 7      | GmGIF7-F   | GCAGCACGCTCATCTCTT      |
|        | GmGIF7-R   | CCTCCTCCCACATTCACA      |
| 8      | GmGIF8-F   | AACTTGGCATGAGCTCCAAT    |
|        | GmGIF8-R   | CTCGGCCTTCACCAGAAC      |
| 9      | GmACTIN2-F | ACTGGAATGGTGAAGGCAGG    |
|        | GmACTIN2-R | CATTGTAAAATGTGTGATGCCAG |
